# Supplementary material
Source: MDPI journal article supplement (https://www.mdpi.com/2673-3986/3/4/40)
Supplement: s1 [file s1]

**Table S1.** Definition of ICH metrics.

- 
1. Ideal Blood Pressure (BP): Ideal BP was defined as SBP < 120 mmHg and DBP < 80 mmHg, and without taking any antihypertensive medication. Intermediate BP was defined as SBP 120–139 mmHg or DBP 80–89 mmHg or receiving any antihypertensive medication. Poor BP was defined as BP  $\geq 140/\geq 90$  mmHg.
  2. Ideal Total Cholesterol (TC): Ideal TC was defined as serum TC < 200 mg/dL and without taking any cholesterol-lowering medication. Intermediate TC was defined as serum TC 200–239 mg/dL or treated to TC < 200 mg/dL. Poor TC was defined as serum TC  $\geq 240$  mg/dL.
  3. Ideal Fasting Plasma Glucose (FPG): Ideal FPG was defined as <100 mg/dL and without any glucose-lowering medication. Intermediate FPG was defined as glucose 100–125 mg/dL or treated to <100 mg/dL. Poor FPG was defined as glucose  $\geq 126$  mg/dL.
  4. Body Mass Index (BMI): BMI was calculated by dividing the participant's weight measured in kilogram (kg), divided by height squared ( $\text{m}^2$ ). Ideal BMI was defined as 18.5–24.9  $\text{kg}/\text{m}^2$ . Intermediate BMI was defined as 25.0–29.9  $\text{kg}/\text{m}^2$ . Poor BMI was defined as BMI  $\geq 30$   $\text{kg}/\text{m}^2$  <sup>1</sup>.
  5. Smoking: Ideal smoking habit was defined as self-reported never smoking behavior. Intermediate smoking habit was defined as a former smoking habit. Poor smoking habit was defined as being a current smoker.
  6. Ideal diet: Daily intake of at least 4.5 servings of Fruits and vegetables was considered as an ideal diet. A poor diet was an intake of <4.5 servings per day.
  7. Physical activity: If a participant participated in at least 300 min of moderate-intensity aerobic physical activity/week or at least 150 min of vigorous-intensity aerobic physical activity/week, then it is defined as ideal physical activity. If a participant participated in at least 150 min of moderate-intensity aerobic physical activity/week or at least 75 min of vigorous-intensity aerobic physical activity/week, then it is defined as intermediate physical activity. Those who did not meet these criteria were categorized under poor physical activity.
- 

<sup>1</sup> Underweight (BMI < 18.5  $\text{kg}/\text{m}^2$ ) was excluded from the analysis.

**Table S2.** Cross tabulation between the place of residence and division of residence (N = 5930).

| <b>Division</b> | <b>Urban (<i>n</i>) *</b> | <b>Urban (%) **</b> | <b>Rural (<i>n</i>) *</b> | <b>Rural (%) **</b> | <b>Total</b> |
|-----------------|---------------------------|---------------------|---------------------------|---------------------|--------------|
| Dhaka Rural     | 286                       | 38.4                | 383                       | 19.4                | 669          |
| Barisal         | 364                       | 4.9                 | 365                       | 6.0                 | 729          |
| Chittagong      | 375                       | 18.0                | 365                       | 20.5                | 740          |
| Khulna          | 380                       | 9.6                 | 427                       | 13.0                | 807          |
| Mymensingh      | 340                       | 5.7                 | 372                       | 9.4                 | 712          |
| Rajshahi        | 404                       | 12.3                | 417                       | 14.2                | 821          |
| Rangpur         | 387                       | 6.9                 | 390                       | 11.5                | 777          |
| Sylhet          | 351                       | 4.2                 | 324                       | 6.1                 | 675          |
| Total           | 2887                      |                     | 3043                      |                     | 5930         |

\* Unweighted Frequency. \*\* Weighted Percentage.
